# Supplementary material for: Minimal twister sister-like self-cleaving ribozymes in the human genome revealed by deep mutational scanning
Source: eLife. 2024 Dec 5;12:RP90254. doi: 10.7554/eLife.90254 (PMC11620745; doi:10.7554/eLife.90254)
Supplement: Supplementary file 1. [file elife-90254-supp1.xlsx]

## Sheet: Sheet1
The number of mutants and the coverage of single and double mutations of LINE-1 ribozyme in two deep mutational scanning experiments for the original sequence (LINE-1-ori) and the functional region (LINE-1-rbz), respectively.
Mutations	Single mutation			Double mutation
	Number	Total	Coverage	Number	Total	Coverage
LINE-1-ori	429	438	0.979	17671	95265	0.185
OR4K15-ori	410	420	0.976	14159	87570	0.162
LINE-1-rbz	137	138	0.993	9310	9315	0.999
Summary of two deep sequencing results for the original sequence (LINE-1-ori) and the functional region (LINE-1-rbz), respectively.
	Number of DNA-seq reads	Number of Barcodes	Number of mutants	Number of RNA-seq reads	Cleaved reads	Uncleaved reads
LINE-1-ori	89053476	168221	70962	59208161	1982615	39512450
OR4K15-ori	184729367	215650	61515	104916717	4847896	83394992
LINE-1-rbz	66952586	373301	162752	69904460	69904460	NA
