# Supplementary material for: Minimal twister sister-like self-cleaving ribozymes in the human genome revealed by deep mutational scanning
Source: eLife. 2024 Dec 5;12:RP90254. doi: 10.7554/eLife.90254 (PMC11620745; doi:10.7554/eLife.90254)
Supplement: Supplementary file 2. [file elife-90254-supp2.xlsx]

## Sheet: Sheet1
Sequences with similar motifs found in a specialized Rfam database.
Accession	Family	Start	End	Length
URS0000D6A998_12908/1-71	Twister-sister (RF02681)	3	67	71
Matched sequence:
|GCAGG|GCTAG|GCCC|AGTCCCGTGCAAGCCGGGACCGCCCCGAAAGGGGCG|CGGC|GCTCAA|CCTGC|
URS0000D698FC_12908/1-80	Twister-sister (RF02681)	3	67	80
Matched sequence:
|CTAGG|GCAAG|GTAC|AATCCCGTGCAAGCCGGGATCAGGGGTAGGTGCGATCTACCCCTG|CTAC|GCTCAA|CCTAC|
URS0000D6995E_12908/1-79	Twister-sister (RF02681)	3	75	79
Matched sequence:
|CTAGG|GCAAG|GTAC|AATCCCGTGCAAGCCGGGATCAGGGGTAGTGCGATCTACCCCTG|CTAC|GCTCAA|CCTAC|
