# Supplementary material for: Minimal twister sister-like self-cleaving ribozymes in the human genome revealed by deep mutational scanning
Source: eLife. 2024 Dec 5;12:RP90254. doi: 10.7554/eLife.90254 (PMC11620745; doi:10.7554/eLife.90254)
Supplement: Supplementary file 3. [file elife-90254-supp3.xlsx]

## Sheet: Sheet1
Oligonucleotides used in this study.
Name	Sequence (5’ - 3’)	Notes
Rz_LINE-1_wt	TAATACGACTCACTATAGGGATACGTAGGTGGTTTTCCCCTGATAGTGCTAAGGGGGCCTGGAAGTTTGGACTGGGCAGAGCTCAACACAGCGTGGCAAAGTGGCTGTGGCTAGACTGCCTCTCTGGATTCCTCGTCACTCAGCAGGGCATCTCTGAGAGAAATGCCATTTGAGTTACTCAGGATTACTGGCCGTCGTTTTAC	DNA template.
Rz_OR4K15_wt	TAATACGACTCACTATAGGGAGTTAACGGTCATAGGCCATGGAAACTAGGAGCACCATTTCGCTGCCAGTGAAGAAATGAACAAAGAAAATCTGGGCCAGGCAGGCATCAAAAGAAATAGTCTTGCGCTCAACCAGAAAGTCTGTAATCATTTTAAGGGTAATTTGAGTTACTCAGGATTACTGGCCGTCGTTTTAC	DNA template.
Rz_LINE-1_doped	TAATACGACTCACTATAGGGGCAGAGCTCAACACAGCGTGGCAAAGTGGCTGTGGCTAGACTGCCAANNNNNNNNNNNNNNNNNNACTGGCCGTCGTTTTAC	Doped library.
M13F	GTAAAACGACGGCCAGT	PCR primer.
T7prom	TAATACGACTCACTATAGGG	PCR primer.
RT_m13f_adp1	CCCTACACGACGCTCTTCCGATCTGTAAAACGACGGCCAGT	Reverse transcription primer.
TSO	CTCGGCATTCCTGCTGAACCGCTCTTCCGATCTrGrGrG	Template switching oligo.
rM13R_5desBio_3P	/5’deSBioTEG/rCrArCrArGrGrArArArCrArGrCrUrArUrGrArCrC/3’Phos/	Linker for RtcB ligation.
Bar_F	TAATACGACTCACTATAGGGA	PCR primer for adding barcode.
Bar_R	GTAAAACGACGGCCAGTNNNNNNNNNNNNNNNAATCCTGAGTAACTCAAAT	PCR primer for adding barcode.
P5R1_m13f	AATGATACGGCGACCACCGAGATCTACACTCTTTCCCTACACGACGCTCTTCCGATCTGTAAAACGACGGCCAGT	PCR primer for DNA-seq library preparation.
P7R2_t7p	CAAGCAGAAGACGGCATACGAGATCGGTCTCGGCATTCCTGCTGAACCGCTCTTCCGATCTTAATACGACTCACTATAGG	PCR primer for DNA-seq library preparation.
P5R1_adp1	AATGATACGGCGACCACCGAGATCTACACTCTTTCCCTACACGACGCTCTTC	PCR primer for RNA-seq library preparation.
P7R2_adp2	CAAGCAGAAGACGGCATACGAGATCGGTCTCGGCATTCCTGCTGAAC	PCR primer for RNA-seq library preparation.
P7R2_m13r	CAAGCAGAAGACGGCATACGAGATCGGTCTCGGCATTCCTGCTGAACCGCTCTTCCGATCTCAGGAAACAGCTATGACC	PCR primer for RNA-seq library preparation.
LI_S_5F3T	/5’6-FAM/rGrGrCrArGrArGrCrUrCrArArCrArCrArGrC/3’6-TAMRA/	Oligo for activity assay.
LI_E	rGrCrUrGrUrGrGrCrUrArGrArCrUrGrCrC	Oligo for activity assay.
LI_S_dC10	/5’6-FAM/rGrGrCrArGrArGrCrUCrArArCrArCrArGrC	Oligo for activity assay.
OR_S_5F3T	/5’6-FAM/rCrUrUrGrCrGrCrUrCrArArCrCrArGrA/3’6-TAMRA/	Oligo for activity assay.
OR_E	rUrCrUrGrGrGrCrCrArGrGrCrArGrG	Oligo for activity assay.
OR_S_dC40	/5’6-FAM/rCrUrUrGrCrGrCrUCrArArCrCrArGrA	Oligo for activity assay.
LI_S_5F	/5’6-FAM/rGrGrCrArGrArGrCrUrCrArArCrArCrArGrC	Oligo for activity assay.
LI_S_10A_5F	/5’6-FAM/rGrGrCrArGrArGrCrUrArArArCrArCrArGrC	Oligo for activity assay.
LI_S_10G_5F	/5’6-FAM/rGrGrCrArGrArGrCrUrGrArArCrArCrArGrC	Oligo for activity assay.
LI_S_10U_5F	/5’6-FAM/rGrGrCrArGrArGrCrUrUrArArCrArCrArGrC	Oligo for activity assay.
LI_S_11U_5F	/5’6-FAM/rGrGrCrArGrArGrCrUrCrUrArCrArCrArGrC	Oligo for activity assay.
LI_wt	rGrGrCrArGrArGrCrUrCrArArCrArCrArGrCrGrUrGrGrCrArArArGrUrGrGrCrUrGrUrGrGrCrUrArGrArCrUrGrCrC	Mutants for activity assay.
LI_c1	rGrGrUrGrGrArGrCrUrCrArArCrArCrArGrCrArUrGrGrCrArArArGrUrGrGrCrUrGrUrGrGrCrCrArGrArCrUrGrCrC	Mutants for activity assay.
LI_c2	rGrGrUrGrGrArGrCrUrCrArArCrArCrArGrUrGrCrArGrCrArArArGrUrGrGrCrUrGrCrGrGrCrCrArGrArCrUrGrCrC	Mutants for activity assay.
LI_c3	rGrGrUrGrGrArGrCrUrCrArArCrArCrArGrUrGrUrGrGrCrArArArGrUrGrGrCrUrGrCrArGrCrCrArGrArCrUrGrCrC	Mutants for activity assay.
OR_wt	rUrCrUrGrGrGrCrCrArGrGrCrArGrGrCrArUrCrArArArArGrArArArUrArGrUrCrUrUrGrCrGrCrUrCrArArCrCrArGrA	Mutants for activity assay.
OR_c1	rUrCrUrGrGrGrCrCrArGrGrCrGrGrGrCrArUrCrArArArArGrArArArUrArGrUrCrUrUrGrUrGrCrUrCrArArCrCrArGrA	Mutants for activity assay.
OR_c2	rUrCrUrGrGrGrCrCrArGrGrUrGrGrGrCrArUrCrArArArArGrArArArUrArGrUrCrUrUrGrUrGrCrUrCrArArCrCrArGrA	Mutants for activity assay.
OR_c3	rUrCrUrGrGrGrCrCrArUrGrCrArArCrCrCrUrCrArArArGrGrArGrArUrArGrUrCrUrUrGrCrGrCrUrCrArArUrArArArA	Mutants for activity assay.
